# Supplementary figures and images for: Correlation between Cardiac Ultrasound Index and Cardiovascular Risk in Healthy Obese and Overweight Populations
Source: Hindawi journal article supplement (doi:10.1155/2022/2235994), 2022-01-01

Normal

Overweight

Obesity

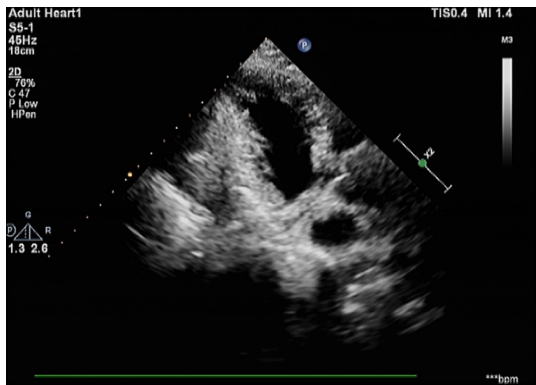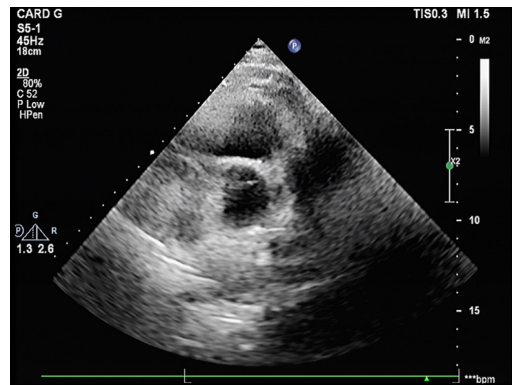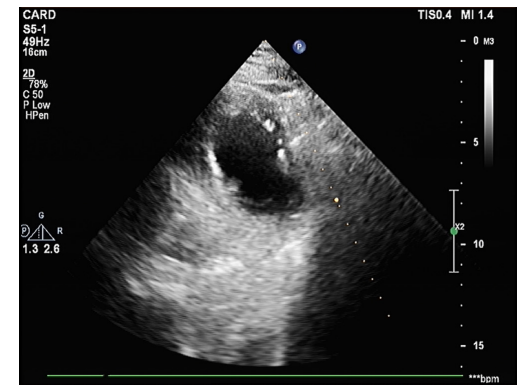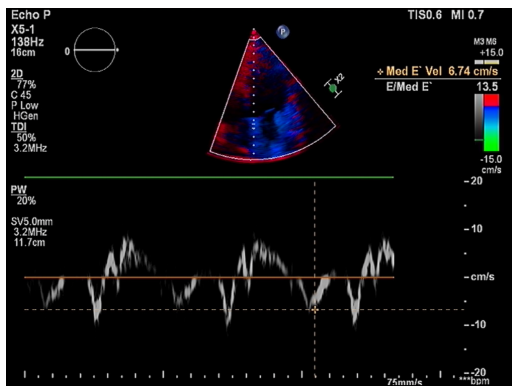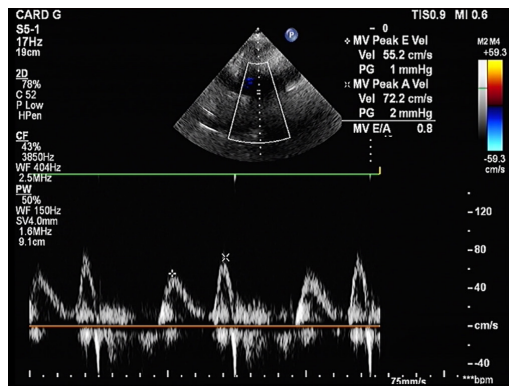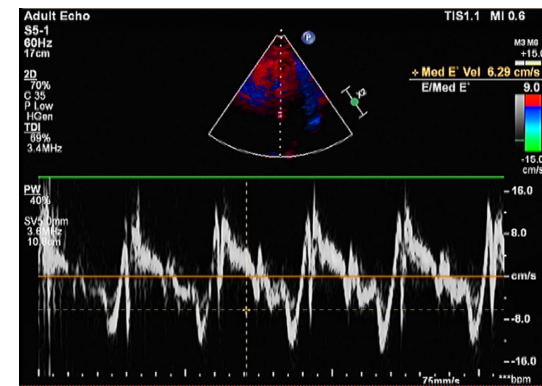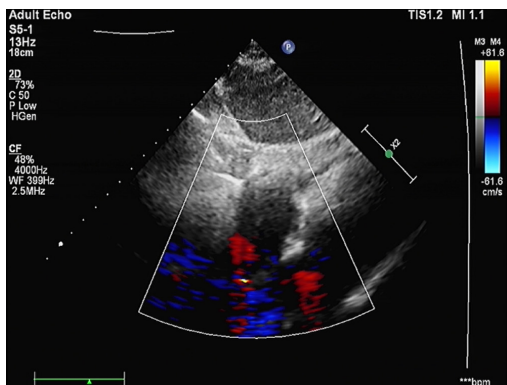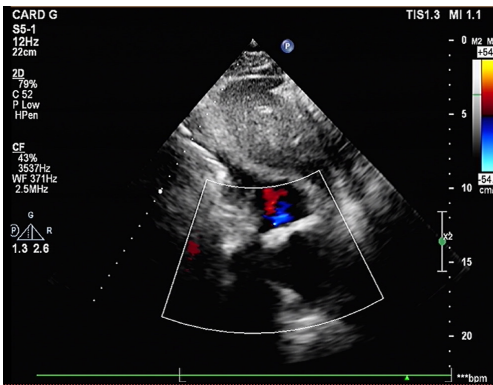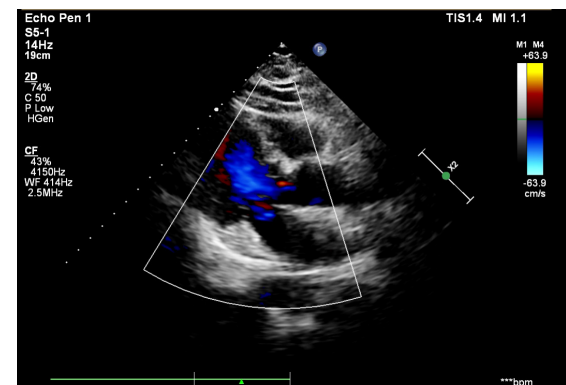

Supplement: f1 [file 2235994.f1.zip]

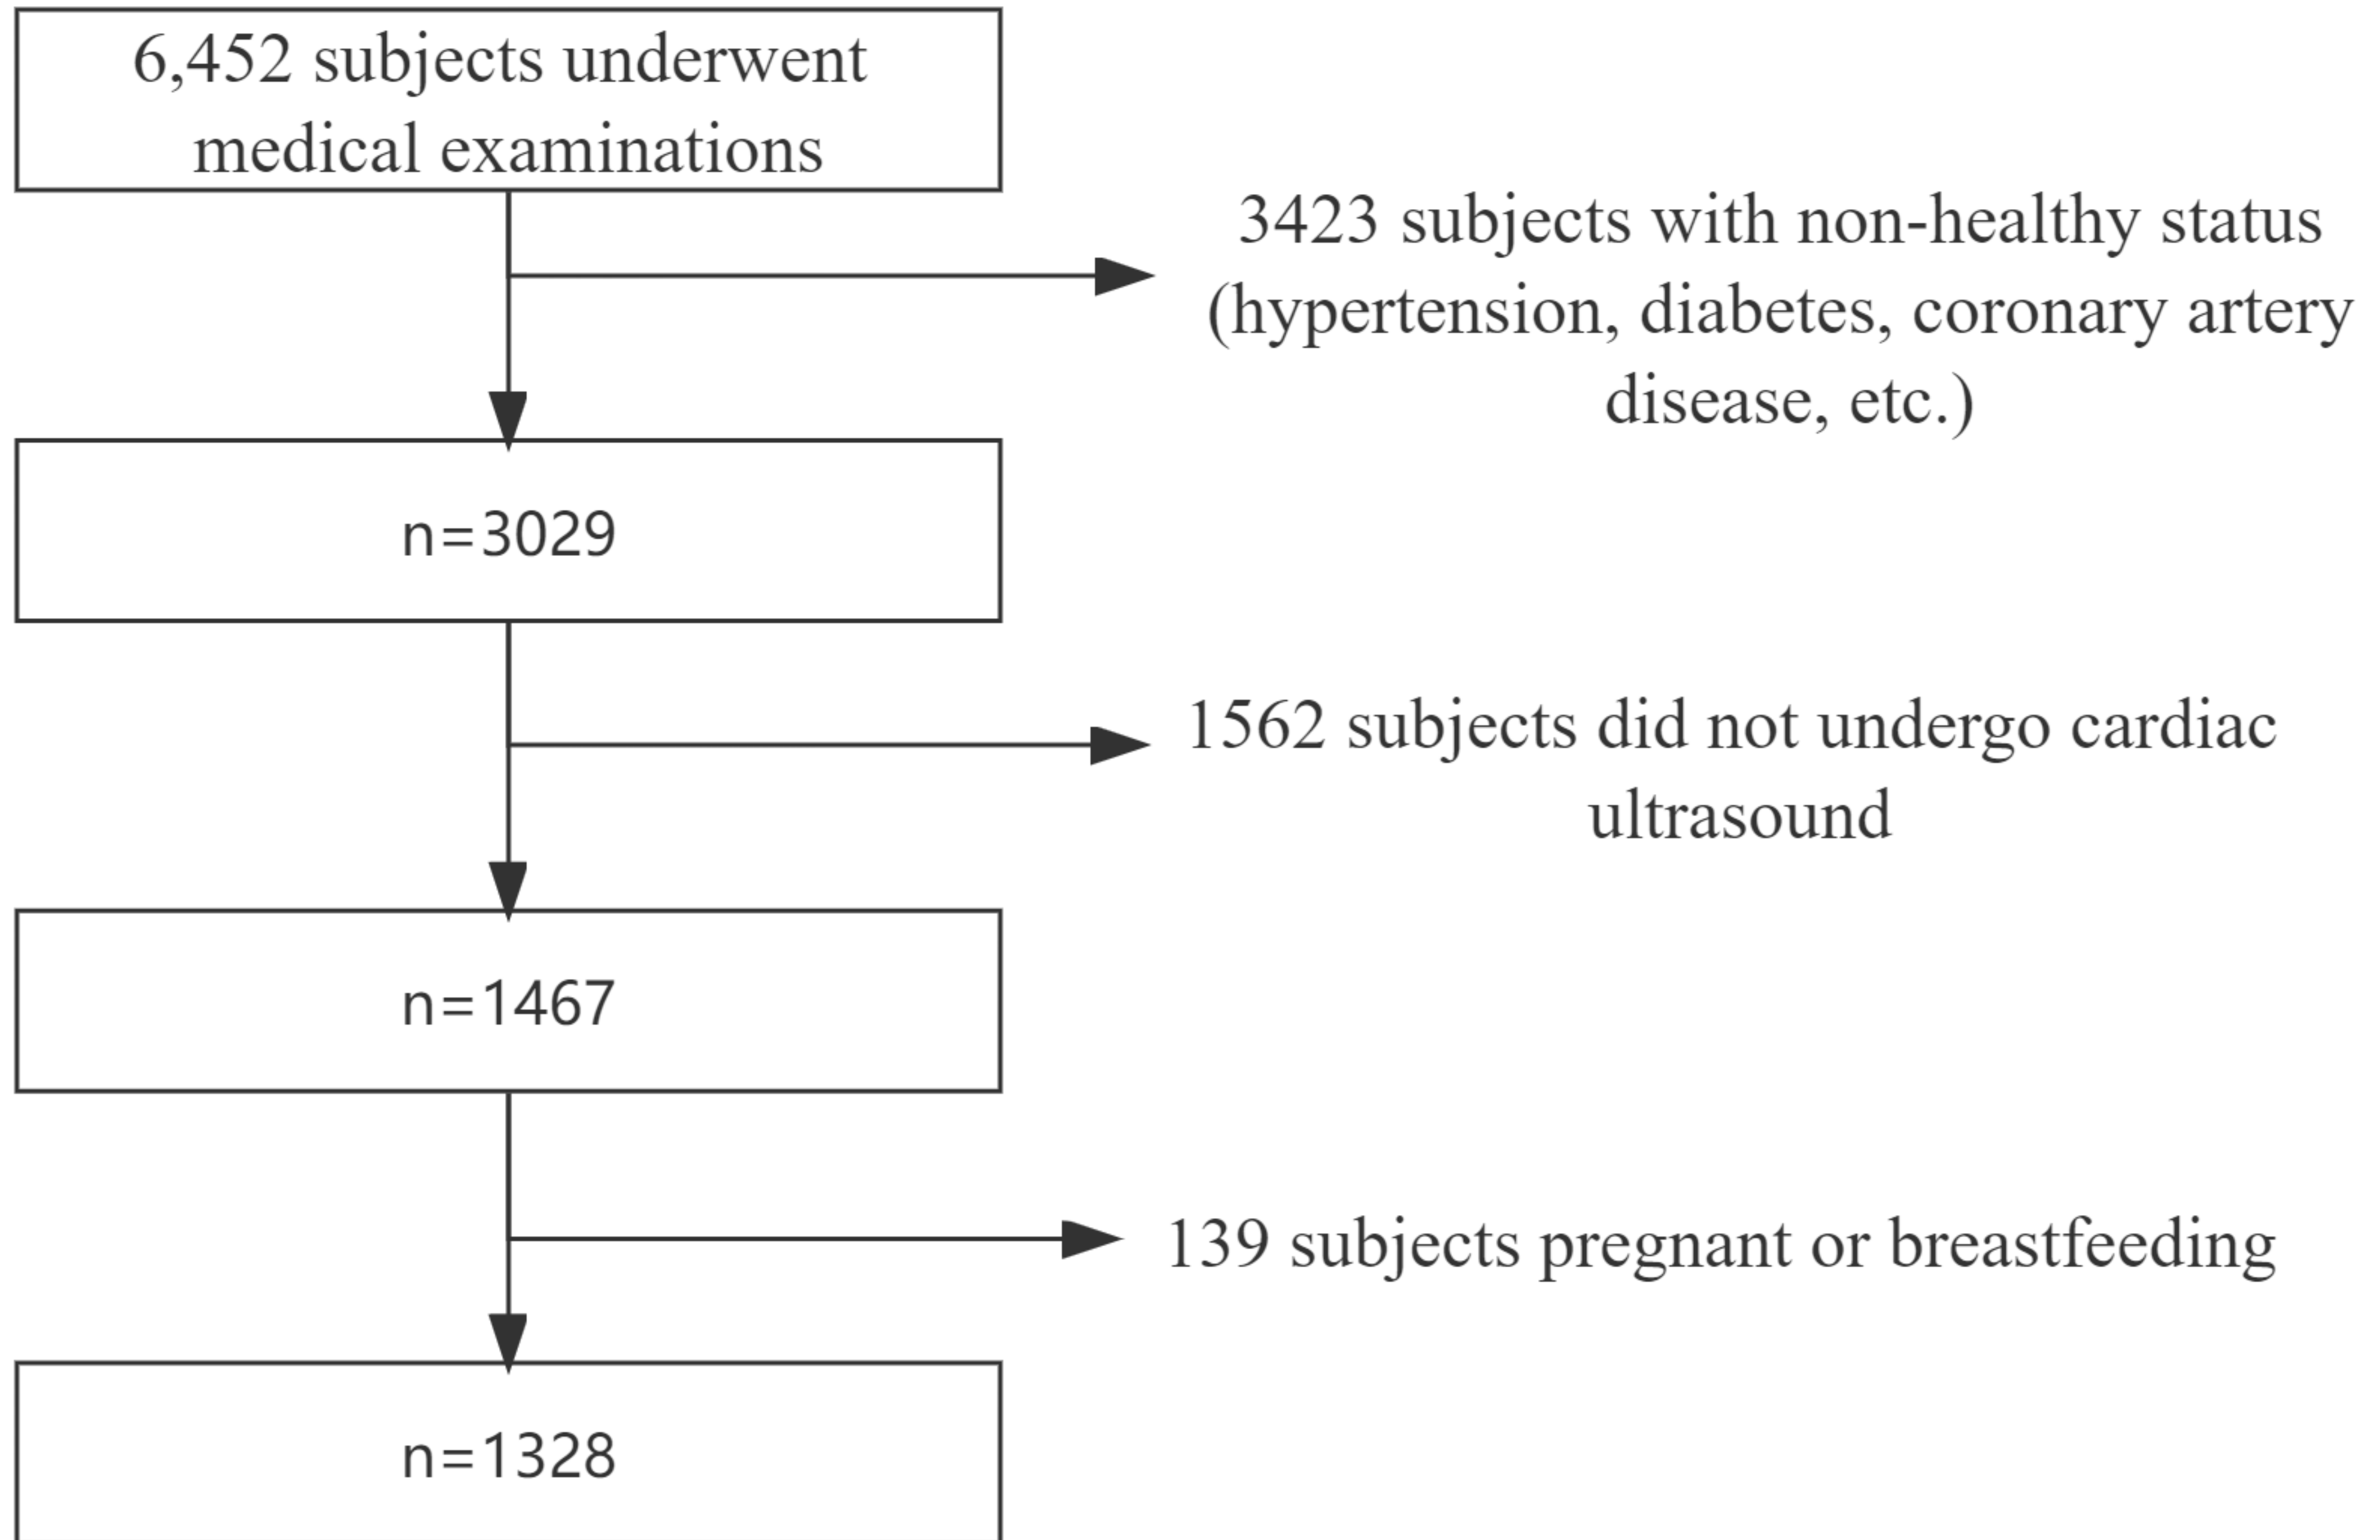

Supplement: f1 [file 2235994.f1.zip]
